# Supplementary material for: Case report on pathogenetic link between gluten and IgA nephropathy
Source: Springer Nature journal article supplement (doi:10.1186/s12876-018-0792-0), 2018-05-16
Supplement: MOESM1 [file 15769586]

| Date   | Medical history                                                                          | Diagnostic procedures                                                                               | Therapeutic interventions                                                                  |
|--------|------------------------------------------------------------------------------------------|-----------------------------------------------------------------------------------------------------|--------------------------------------------------------------------------------------------|
| 1/2014 | gross hematuria, back pain and headache during pulmonary exacerbation of cystic fibrosis | Renal biopsy , IgAN diagnosed (mesangial deposits of anti-tTG2 detected)                            | Intravenous antibiotics for pulmonary exacerbation (piperacillin/tazobactam and colimycin) |
| 1/2014 | dyspepsia                                                                                | upper gastrointestinal endoscopy with duodenal biopsies (intestinal deposits of anti-tTG2 detected) | Gluten containing diet                                                                     |
| 1/2014 |                                                                                          |                                                                                                     | Six months steroid therapy protocol for IgAN                                               |
| 7/2014 | Clinical remission of IgAN                                                               |                                                                                                     | Steroid withdrawal                                                                         |
| 1/2015 |                                                                                          | upper gastrointestinal endoscopy with duodenal biopsies (Marsh 2 type duodenal damage was detected) | Gluten free diet started                                                                   |
